# Supplementary material for: Genomic basis of endosymbiont-conferred protection against an insect parasitoid
Source: HighWire-hosted journal article supplement (doi:10.1101/gr.125351.111), 2011-09-23
Supplement: S_figure_legend.pdf [file S_figure_legend.pdf]

S\_Figure 1.

Phylogenetic relationships of *Regiella insecticola* 5.15 with related best BlastP hit bacterial strains based on a 1,096 amino acid alignment from four concatenated *rfb* genes (*rfbA*, *rfbB*, *rfbC* and *rfbD*) using RAxML with 100 bootstraps.

S\_Figure 2.

Enteric single copy ortholog amino acid phylogeny of *Regiella insecticola* 5.15 and related Enteric bacterial species using RAxML with 100 bootstraps. Based on a 1,639 amino acid alignment from four concatenated single copy ortholog genes (*accD*, *rpoS*, *gyrB*, and *murE*).

S\_Figure 3.

*PhoP* phylogenetic tree displaying the relationship of *Regiella insecticola* 5.15 with best BlastP hit bacterial strains using RAxML on a 221 amino acid alignment with 100 bootstraps.

S\_Figure 4.

*PhoQ* phylogenetic tree of *Regiella insecticola* 5.15 with best BlastP hit bacterial strains using RAxML with 100 bootstraps on a 435 amino acid alignment.
